# Supplementary material for: An Integrative Data Mining and Omics-Based Translational Model for the Identification and Validation of Oncogenic Biomarkers of Pancreatic Cancer
Source: PubMed Central journal article supplement (PMC6407035; doi:10.3390/cancers11020155), 2019-01-29
Supplement: cancers-11-00155-s001.pdf [file cancers-11-00155-s001.pdf]

# Supplementary Materials: An Integrative Data Mining and Omics-Based Translational Model for the Identification and Validation of Oncogenic Biomarkers of Pancreatic Cancer

Nguyen Phuoc Long, Kyung Hee Jung, Nguyen Hoang Anh, Hong Hua Yan, Tran Diem Nghi, Seongoh Park, Sang Jun Yoon, Jung Eun Min, Hyung Min Kim, Joo Han Lim, Joon Mee Kim, Johan Lim, Sanghyuk Lee, Soon-Sun Hong and Sung Won Kwon

## AGR2

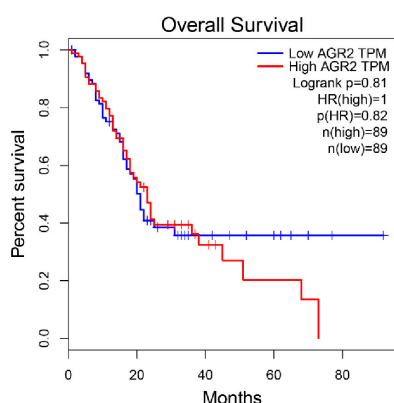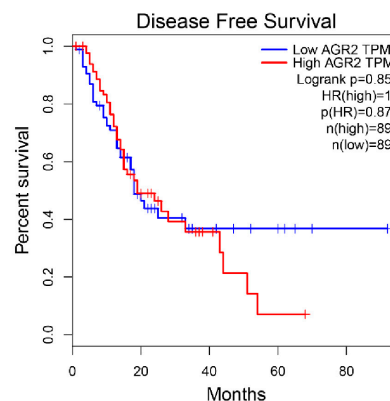

## GAPDH

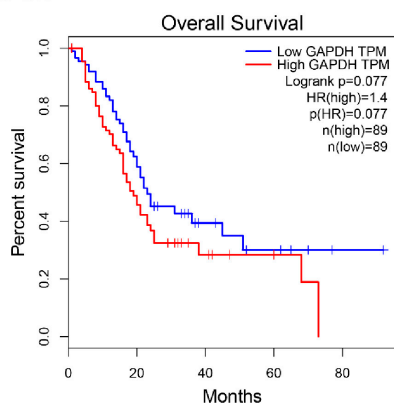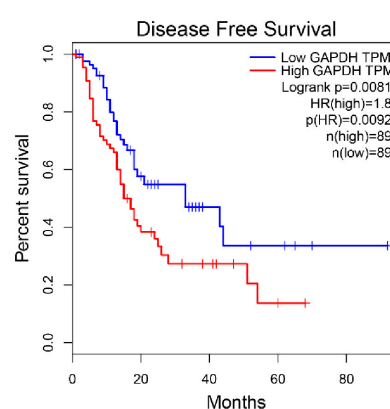

## LAMC2

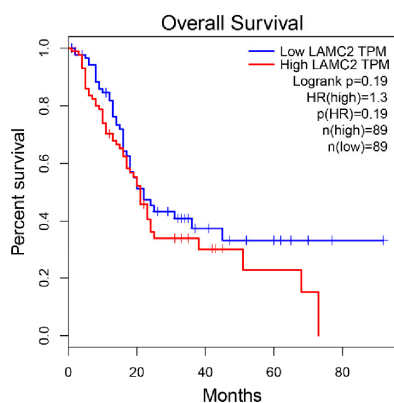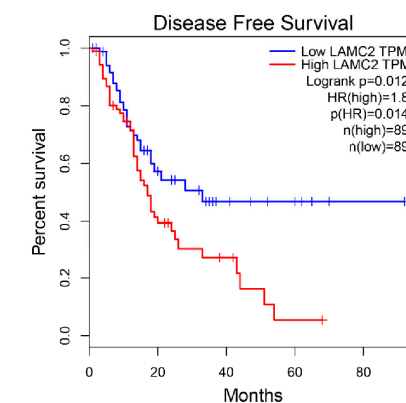

### MMP11

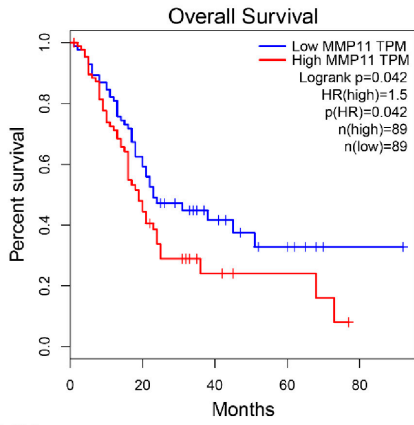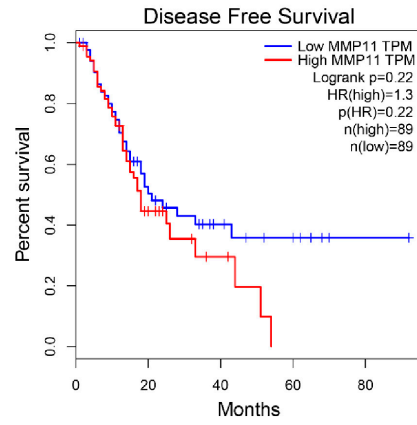

### TAGLN2

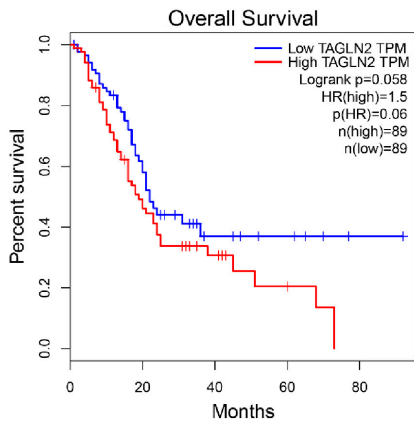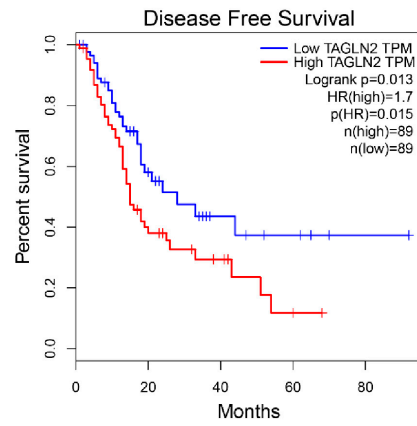

### ADAM9

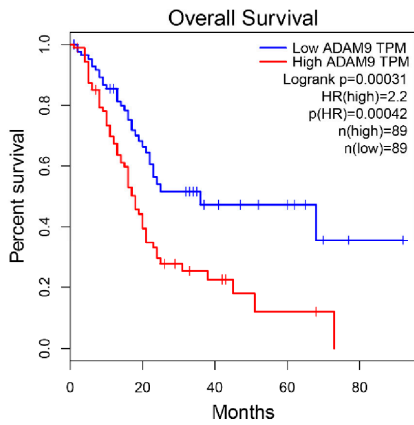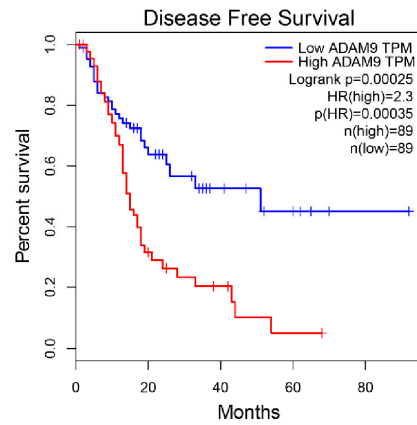

### ANXA2

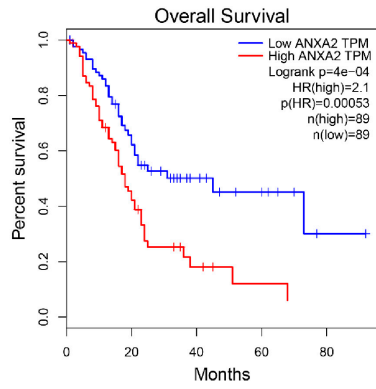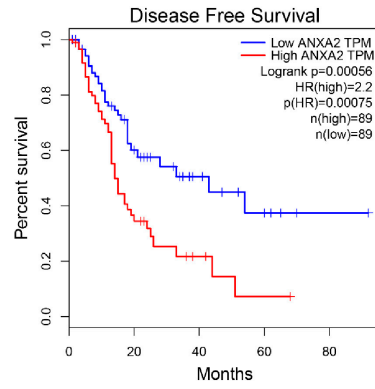

### APLP2

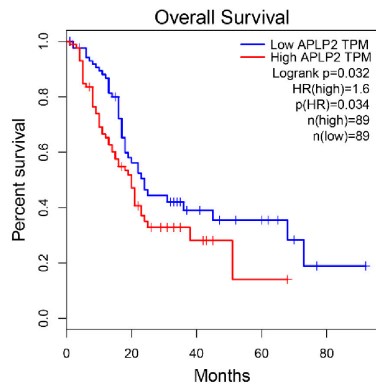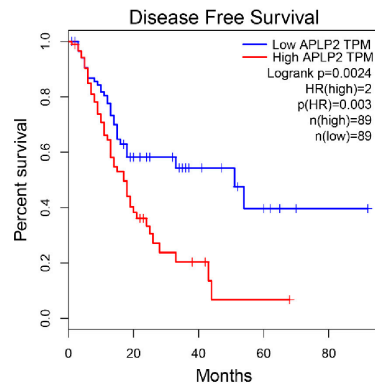

### CDH3

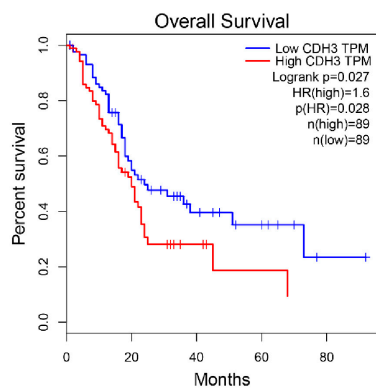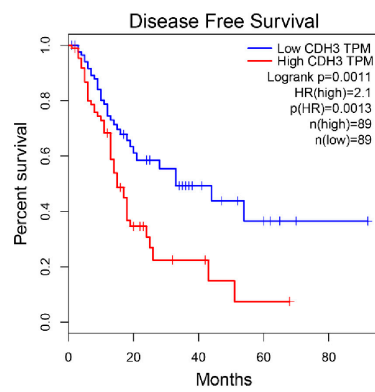

### MSLN

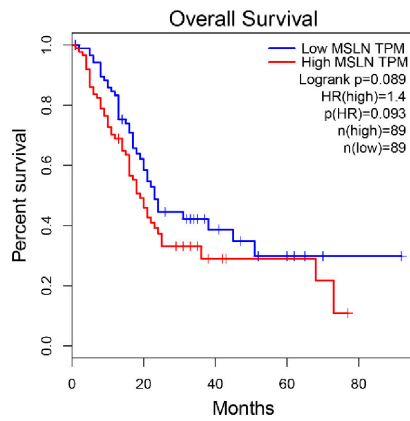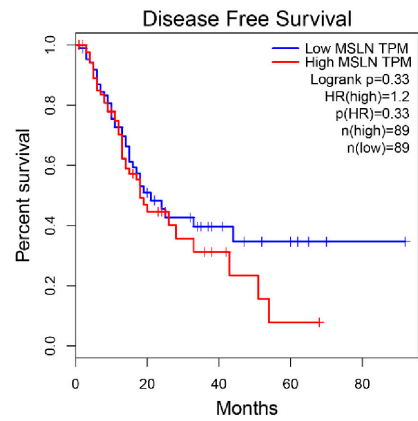

### SERPINB5

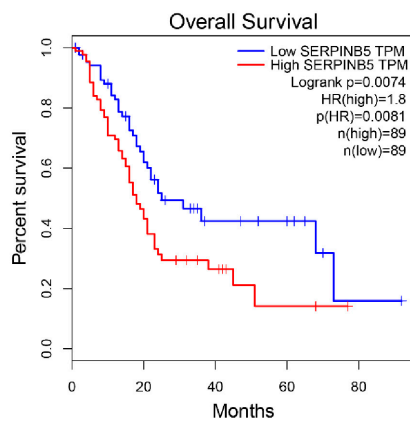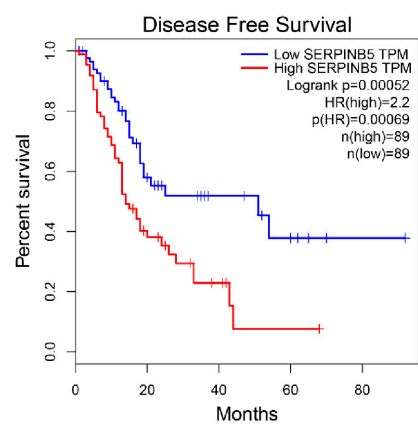

### CD82

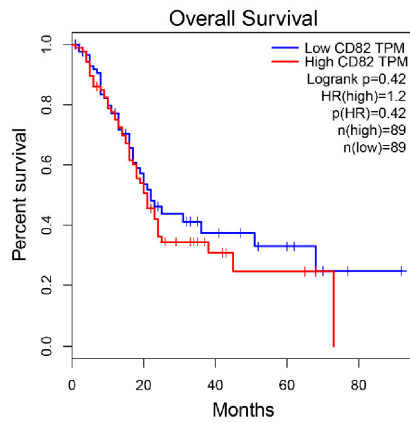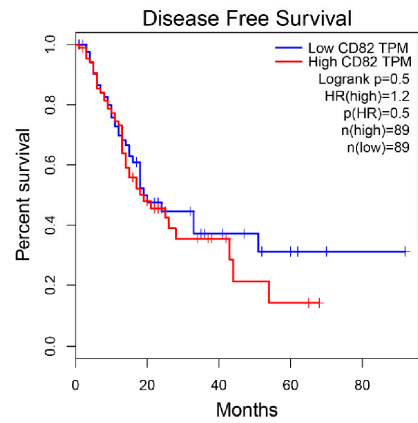

### CLDN18

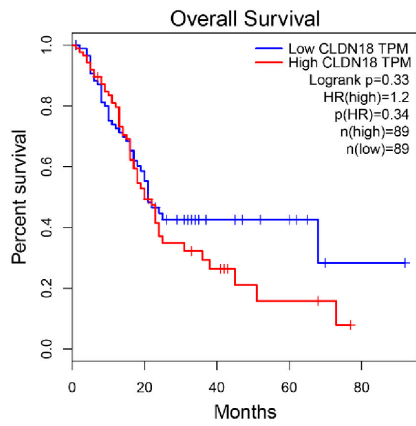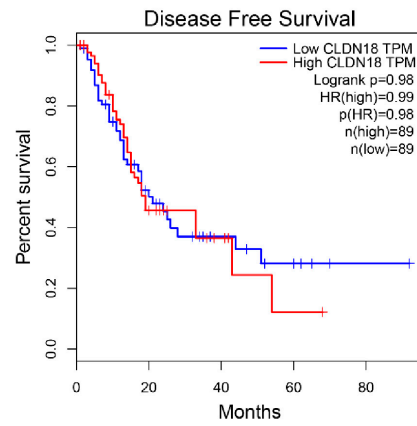

### EPHA2

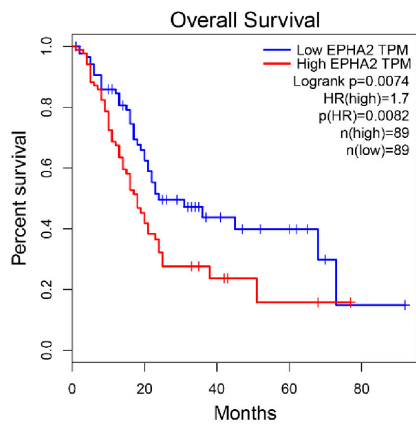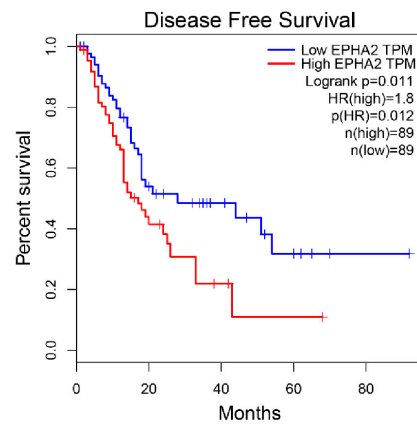

### EZR

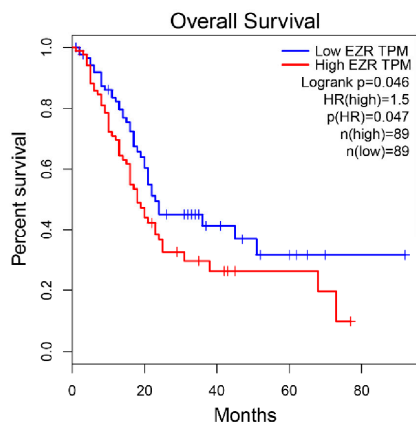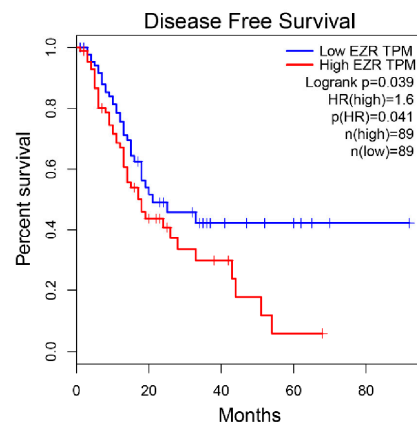

### FXD3

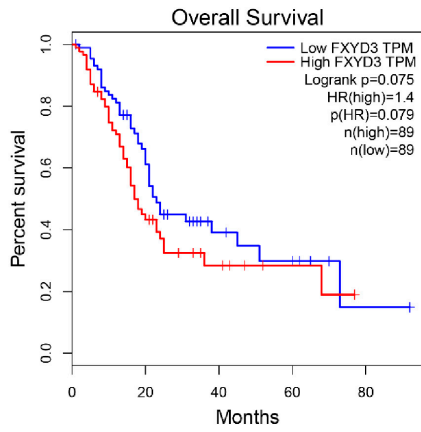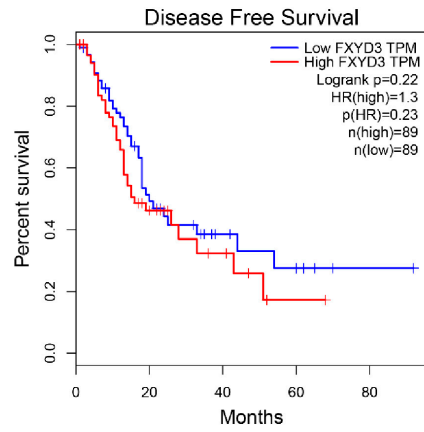

### GPRC5A

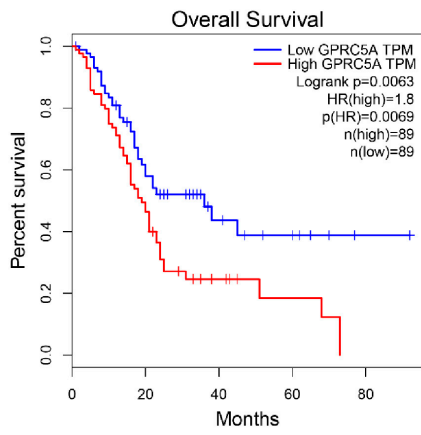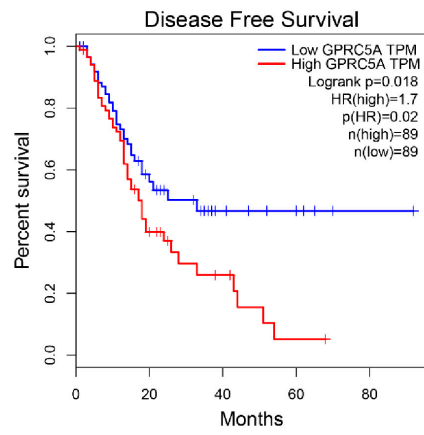

### ITGA2

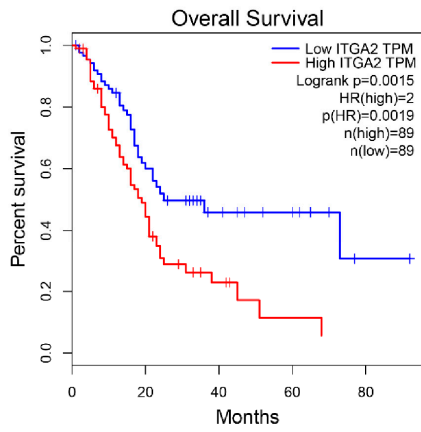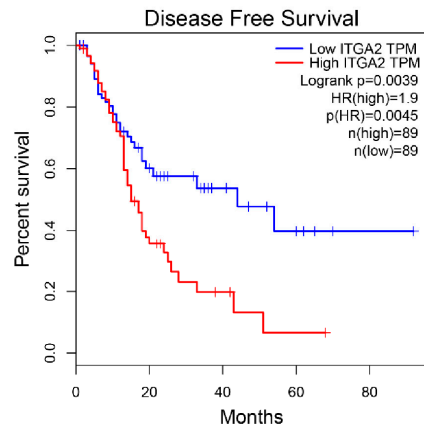

### ITGB6

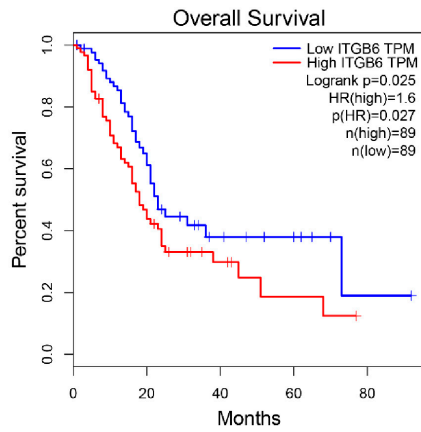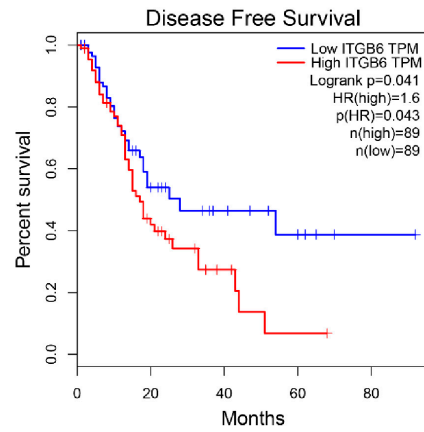

### MET

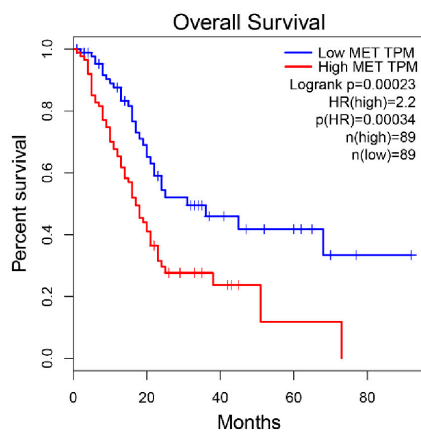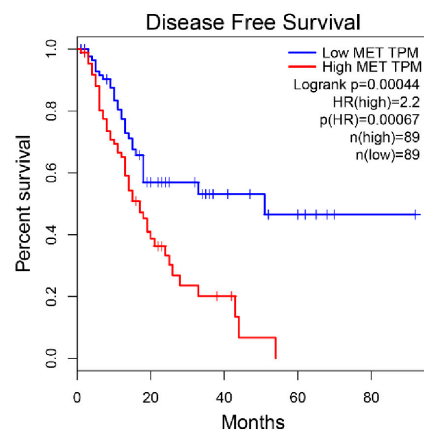

### MST1R

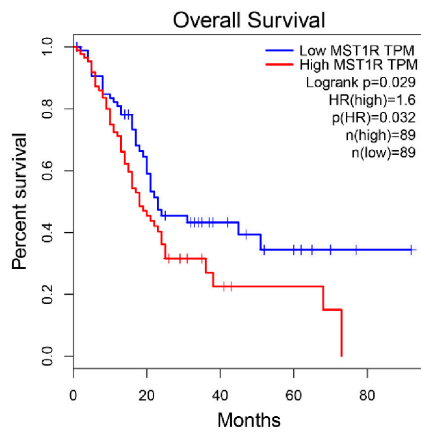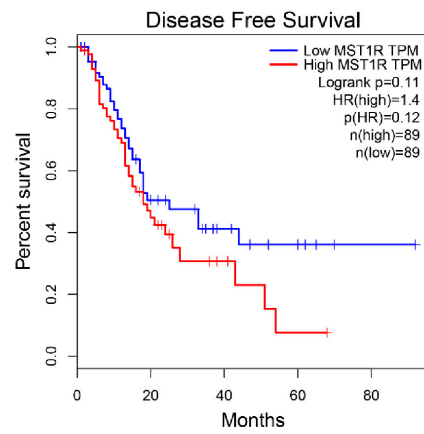

**NQO1**

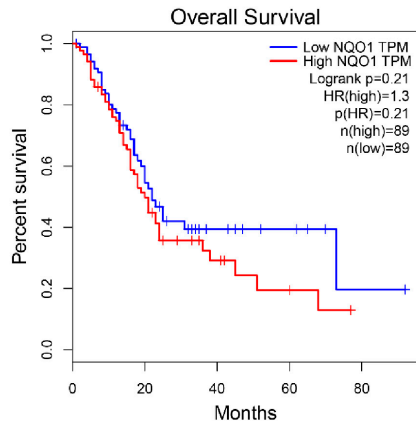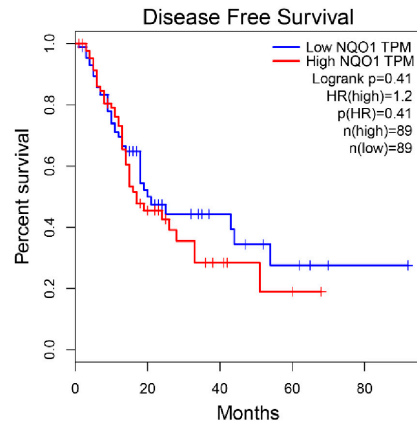

**SLC2A1**

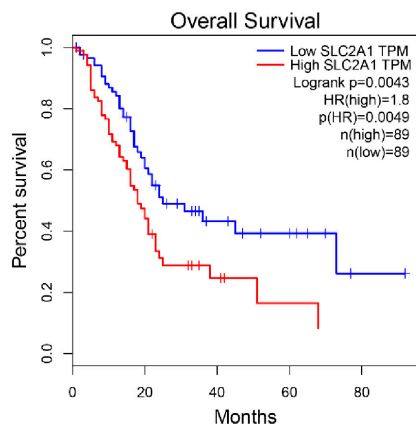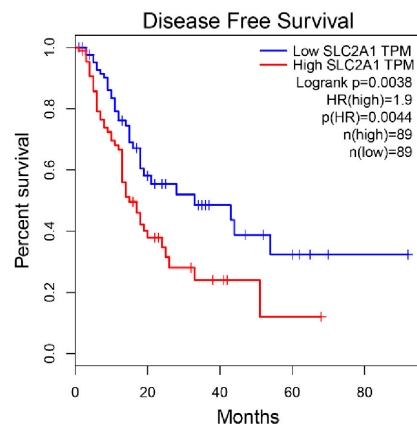

**Figure S1.** Overall survival and disease-free survival plots of the 23 candidates.



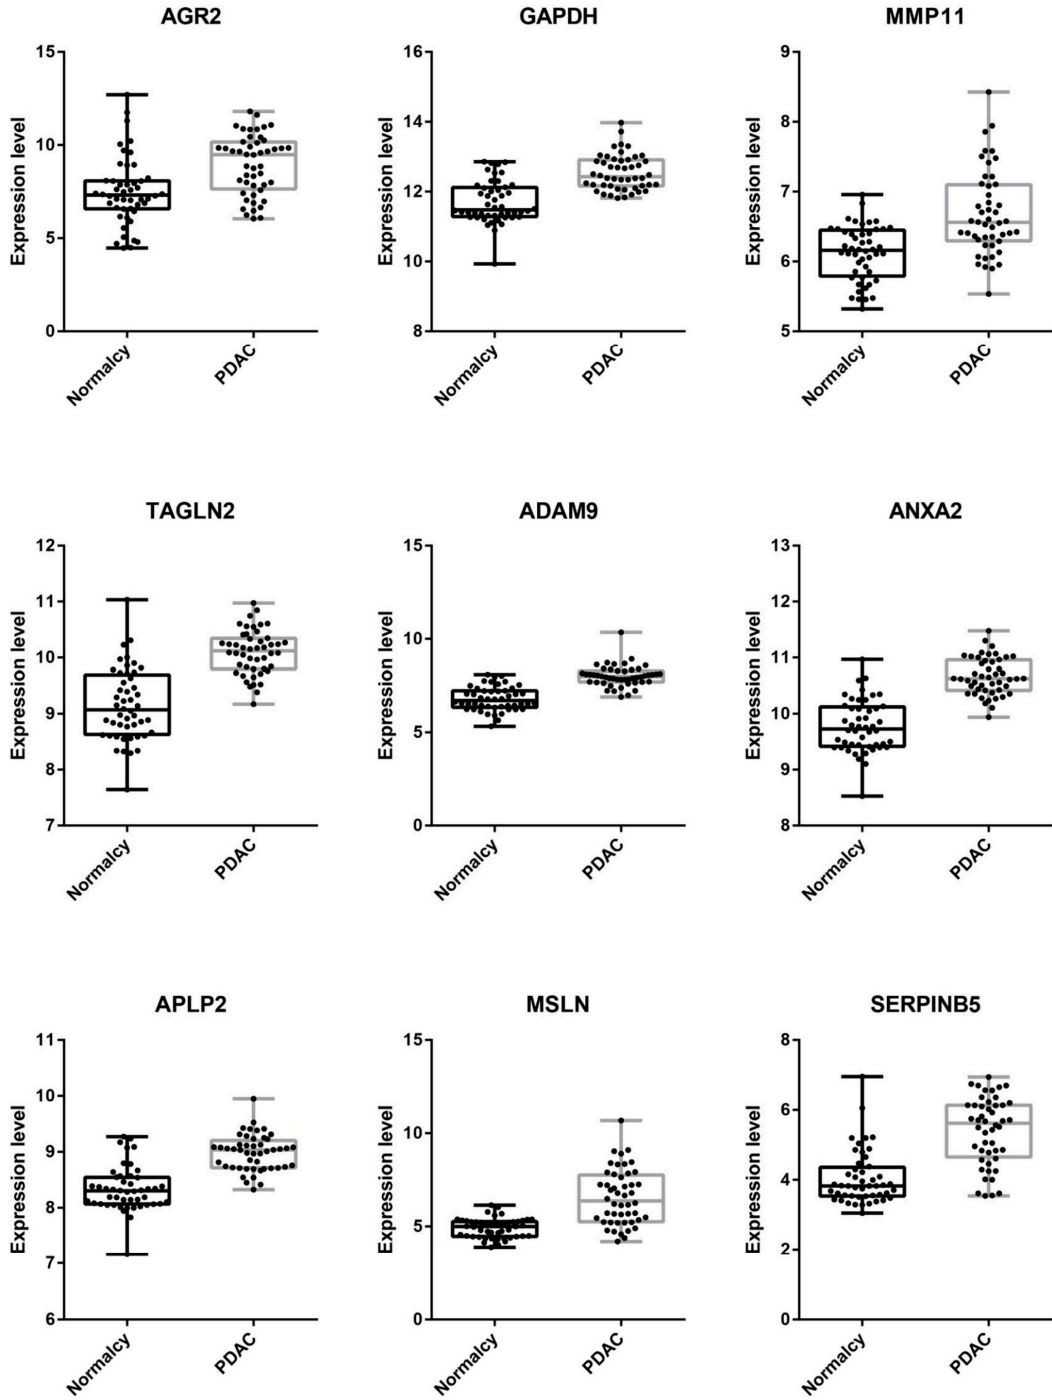

**Figure S2.** Boxplots of the remaining nine secretory protein-coding genes.  $p$  value  $< 0.0001$  was considered statistically significant in all analyses.

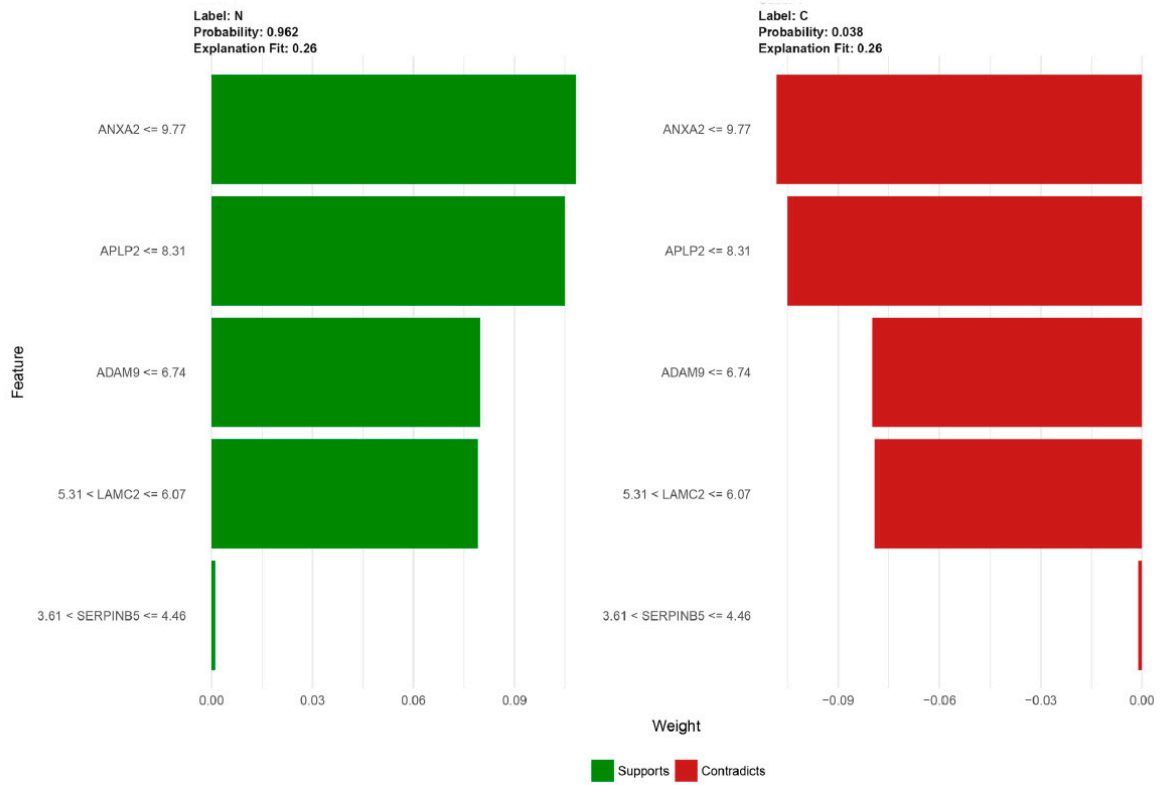

(Case 1)

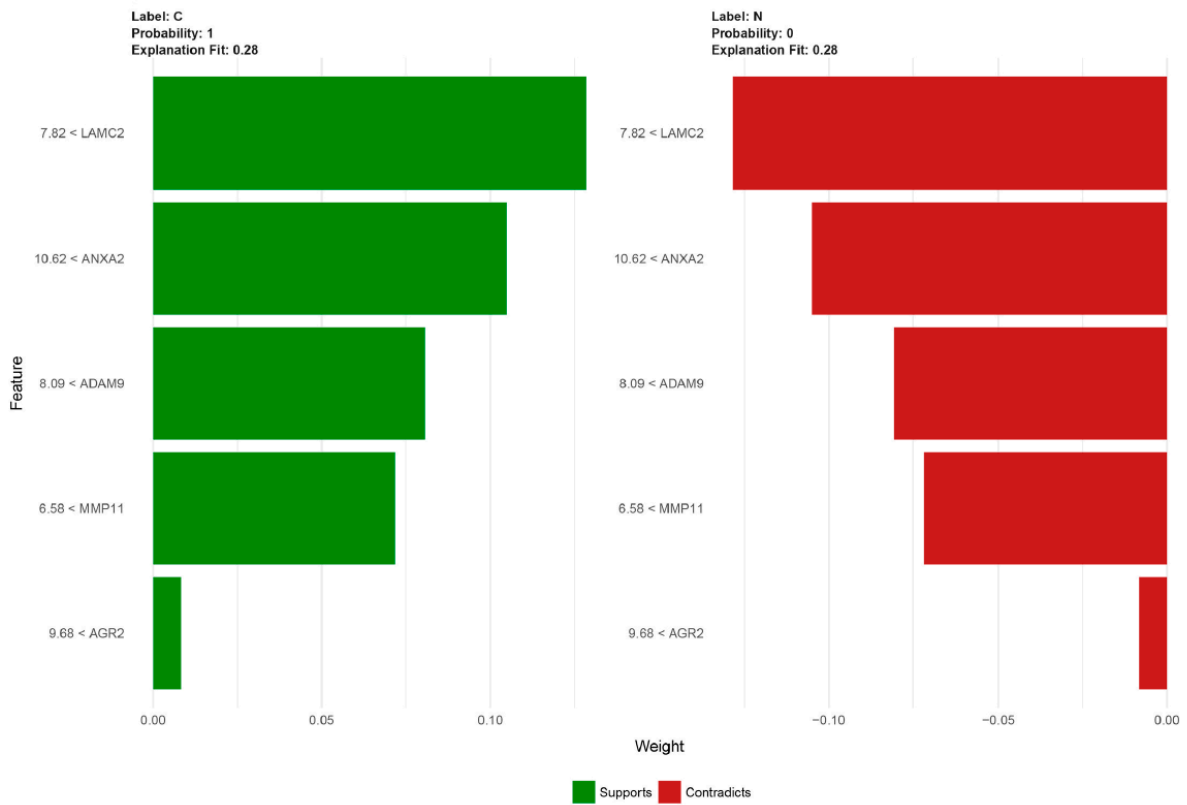

(Case 17)

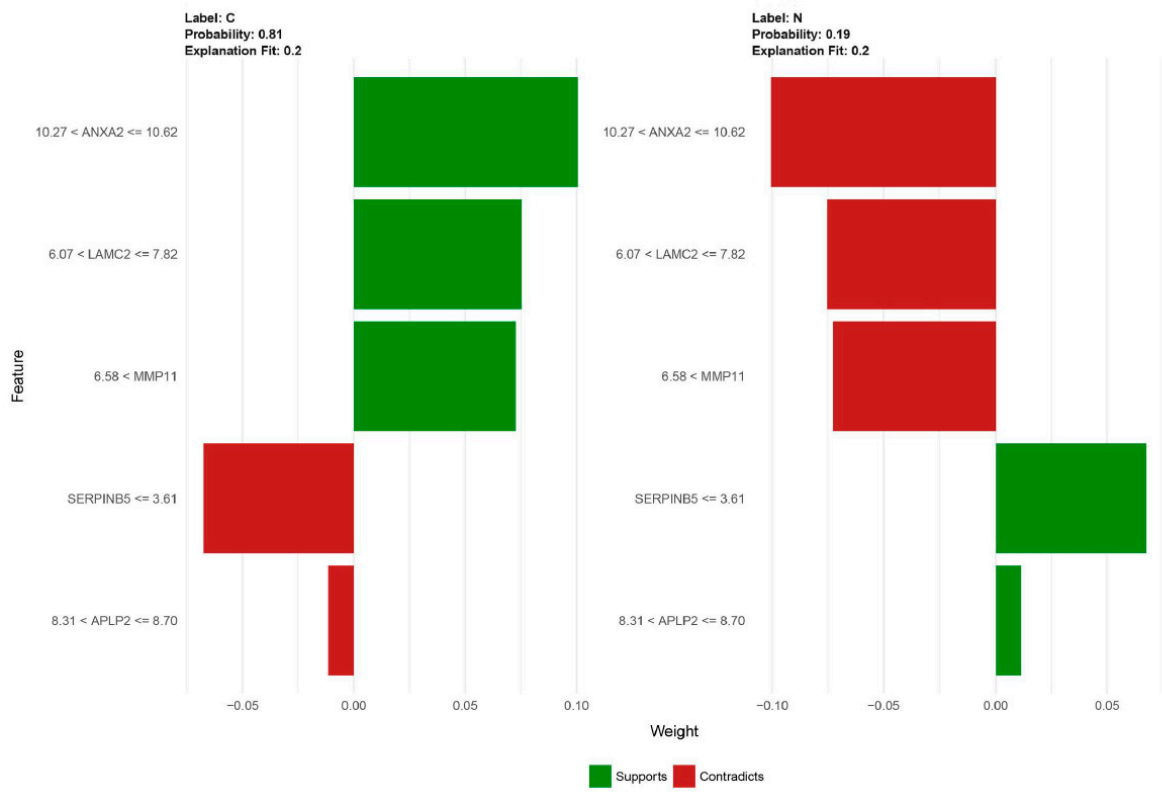

(Case 11)

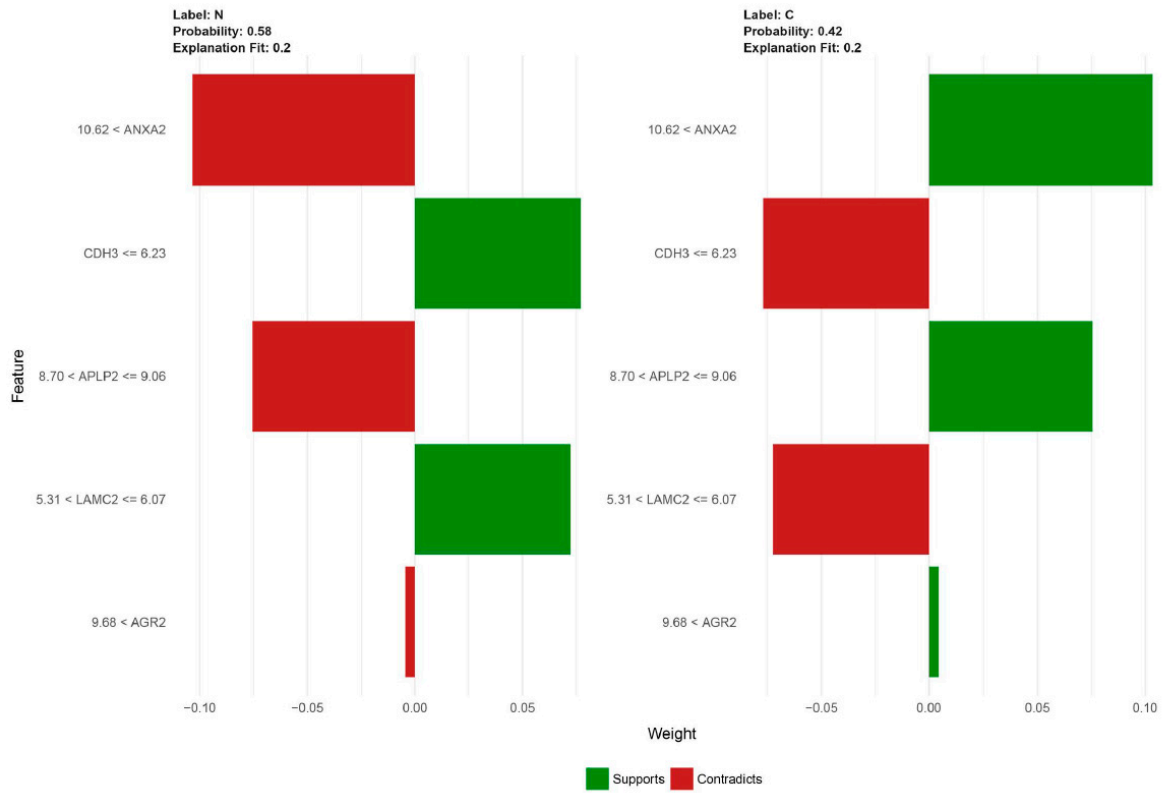

(Case 4)

**Figure S3.** LIME of four representative cases. **Case 1** was certainly predicted as normal tissue based on the rules:  $ANXA2 \leq 9.77$ ,  $APLP2 \leq 8.31$ ,  $ADAM9 \leq 6.74$ ,  $5.31 < LAMC2 \leq 6.07$ , and  $3.61 < SERPINB5 \leq 4.46$ , reaching the probability of 0.962. **Case 17** was certainly predicted as PC based on the rules:  $LAMC2 > 7.82$ ,  $ANXA2 > 10.62$ ,  $ADAM9 > 8.09$ ,  $MMP11 > 6.58$ , and  $AGR2 > 9.68$ , reaching the probability of 1.00. **Case 11** was misclassified from normal case into PC group, likely due to the overexpression of  $ANXA2$  ( $ANXA2 > 10.27$ ),  $MMP11$  ( $MMP11 > 6.58$ ), and  $LAMC2$  ( $LAMC2 > 6.07$ ). **Case 4** was accurately diagnosed normal with the probability of only 0.58 due to the very high expression level of  $ANXA2$  ( $ANXA2 > 10.62$ ) and  $APLP2$  ( $APLP2 > 8.70$ ).

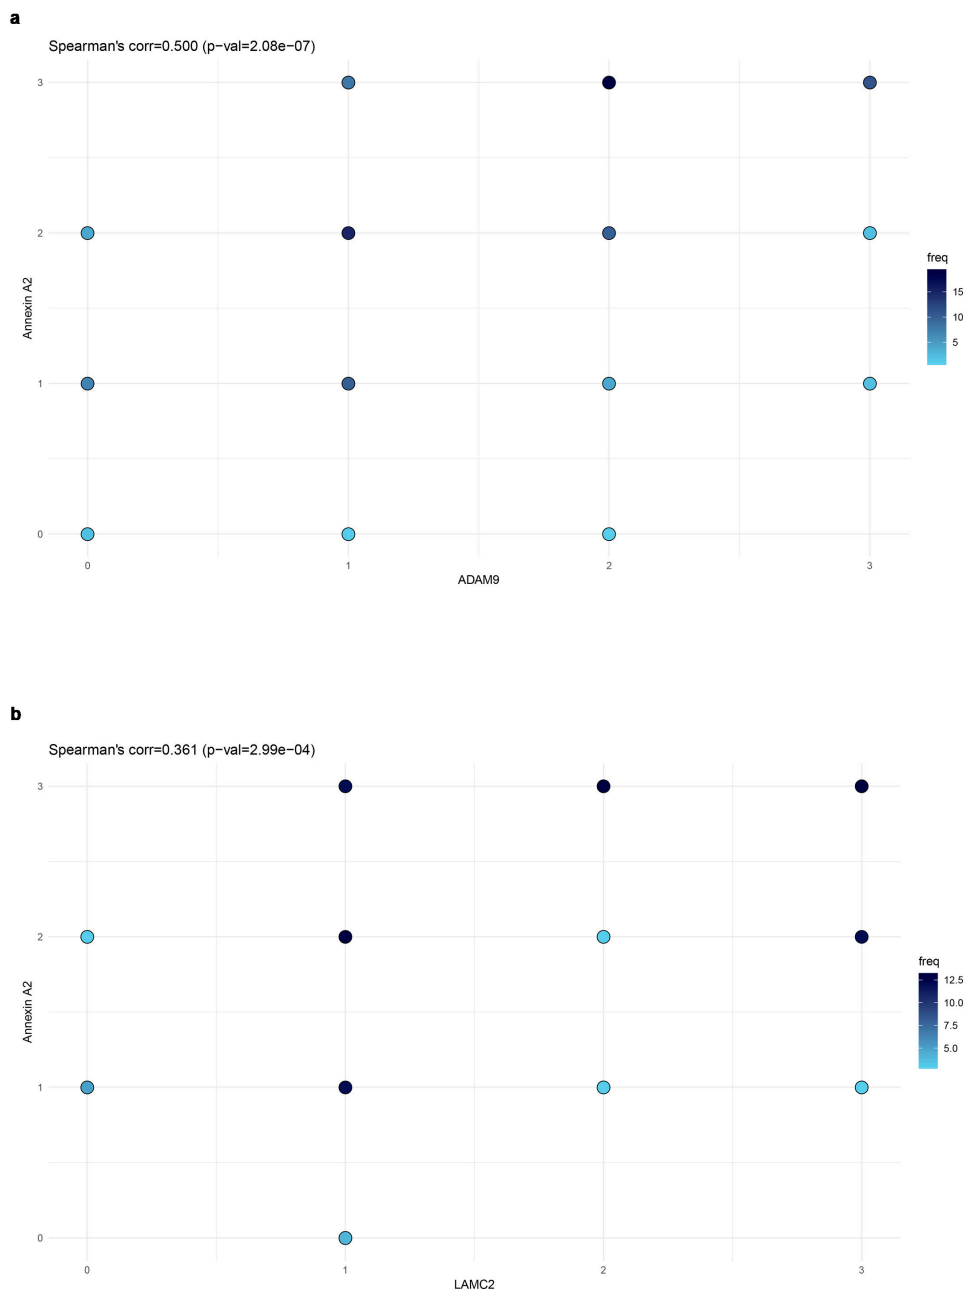

**Figure S4.** Spearman's pairwise correlation analysis for  $ANXA2$ ,  $ADAM9$ , and  $LAMC2$ . (a). Spearman's pairwise correlation between Annexin A2 and  $ADAM9$ . (b). Spearman's pairwise correlation between Annexin A2 and  $LAMC2$ .

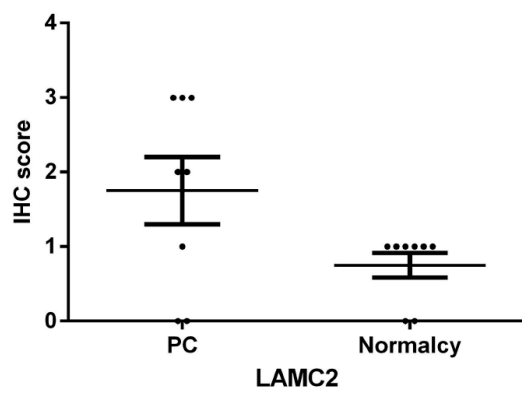

(a)

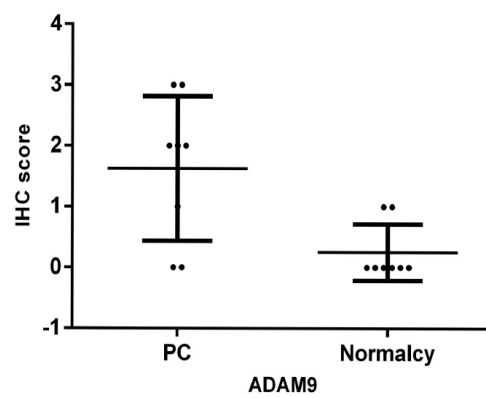

(b)

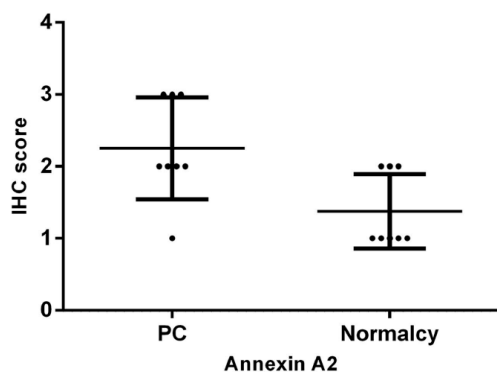

(c)

**Figure S5.** Protein expression level of three promising candidates in eight matched PC and normal samples. (a) Protein expression level of LAMC2. (b) Protein expression level of ADAM9. (c) Protein expression level of Annexin A2.

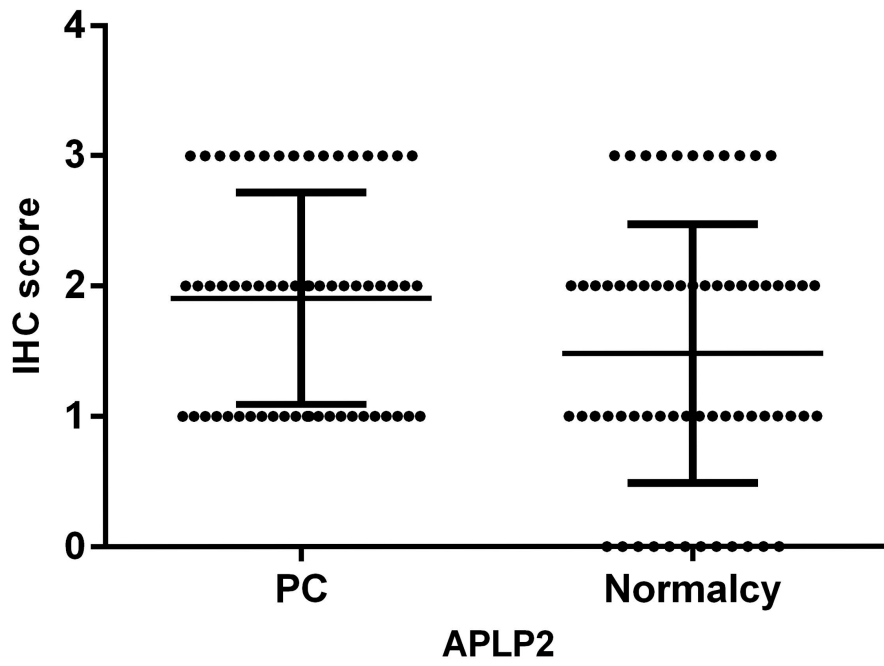

Figure S6. Protein expression level of APLP2 in 64 matched PC and normal samples.

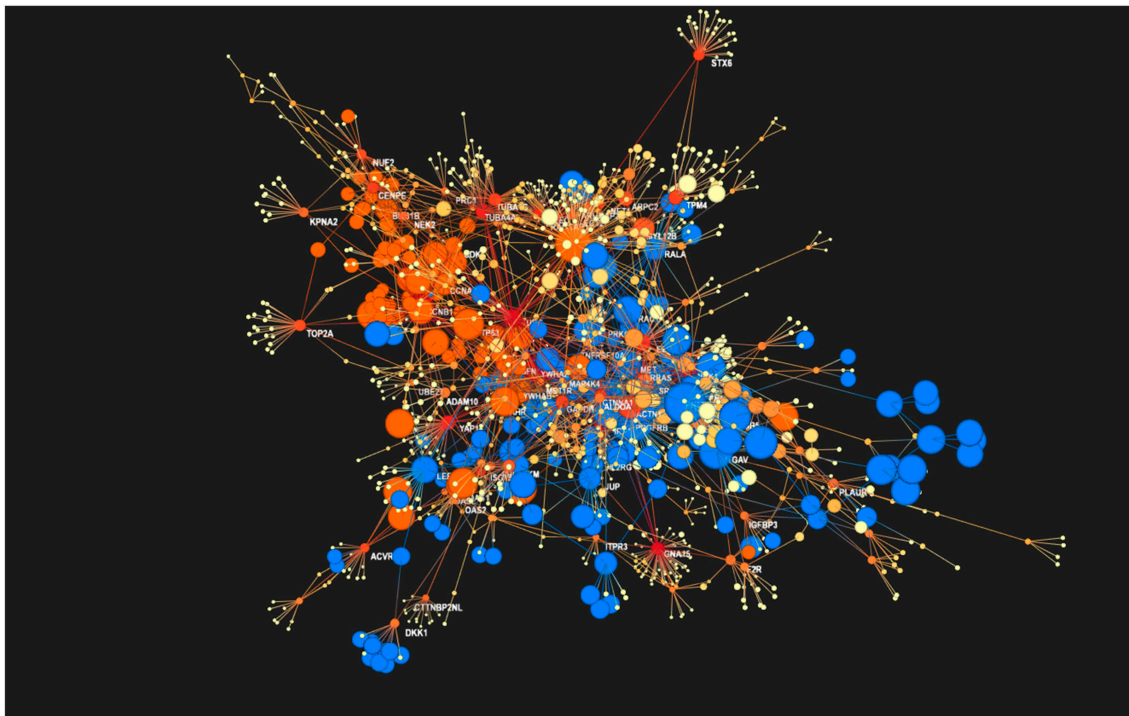

Figure S7. Protein-protein interaction network of 397 upregulated genes in the meta-analysis.

**Table S1.** Characteristics of the included microarray gene expression datasets.

| Author             | Data Set   | Year | Platform      | Country | Samples  |        |          |
|--------------------|------------|------|---------------|---------|----------|--------|----------|
|                    |            |      |               |         | Normalcy | Cancer | Neoplasm |
| Frampton AE et al. | GSE41368   | 2013 | 1.0 ST        | Italy   | 6        | 6      |          |
| Zhang G et al.     | GSE28735   | 2012 | 1.0 ST        | USA     | 45       | 45     |          |
| Sergeant G et al.  | GSE18670   | 2012 | U133 Plus 2.0 | Belgium | 6        | 6      |          |
| Pei H et al.       | GSE16515   | 2009 | U133 Plus 2.0 | USA     | 16       | 36     |          |
| Badea L et al.     | GSE15471   | 2009 | U133 Plus 2.0 | Romania | 36       | 36     |          |
| Hiraoka N et al.   | GSE19650 * | 2010 | U133 Plus 2.0 | Japan   | 7        | 3      | 12       |

\* This data set was used for single analysis.

**Table S2.** Characteristics of the cohort used for assessing the expression of LAMC2, ADAM9, and ANXA2.

| Position | No. | Age | Sex | Organ/Anatomic Site | Pathology Diagnosis                                   | TNM                          | Grade  | Stage | Type      | Tissue ID. |
|----------|-----|-----|-----|---------------------|-------------------------------------------------------|------------------------------|--------|-------|-----------|------------|
| A1       | 1   | 38  | F   | Pancreas            | Duct adenocarcinoma                                   | T2N0M0                       | 1      |       | Malignant | Dpa090259  |
| A2       | 2   | 38  | F   | Pancreas            | Duct adenocarcinoma                                   | T2N0M0                       | 1      |       | Malignant | Dpa090259  |
| A3       | 3   | 74  | M   | Pancreas            | Duct adenocarcinoma (fibrous tissue and blood vessel) | T3N0M0                       | -      |       | Malignant | Dpa080146  |
| A4       | 4   | 74  | M   | Pancreas            |                                                       | Duct adenocarcinoma (sparse) | T3N0M0 | -     |           | Malignant  |
| A5       | 5   | 47  | M   | Pancreas            | Duct adenocarcinoma                                   | T2N0M0                       | 1      |       | Malignant | Dpa090197  |
| A6       | 6   | 47  | M   | Pancreas            | Duct adenocarcinoma                                   | T2N0M0                       | 1      |       | Malignant | Dpa090197  |
| A7       | 7   | 40  | M   | Pancreas            | Duct adenocarcinoma                                   | T2N1M0                       | 1      |       | Malignant | Dpa090186  |
| A8       | 8   | 40  | M   | Pancreas            | Duct adenocarcinoma                                   | T2N1M0                       | 1      |       | Malignant | Dpa090186  |
| A9       | 9   | 54  | M   | Pancreas            | Duct adenocarcinoma                                   | T2N0M0                       | 1      |       | Malignant | Dpa090177  |
| A10      | 10  | 54  | M   | Pancreas            | Duct adenocarcinoma                                   | T2N0M0                       | 1      |       | Malignant | Dpa090177  |
| B1       | 11  | 64  | F   | Pancreas            | Duct adenocarcinoma                                   | T2N0M0                       | 1      |       | Malignant | Dpa090166  |
| B2       | 12  | 64  | F   | Pancreas            | Duct adenocarcinoma                                   | T2N0M0                       | 1      |       | Malignant | Dpa090166  |
| B3       | 13  | 80  | M   | Pancreas            | Duct adenocarcinoma                                   | T2N0M0                       | 2      |       | Malignant | Dpa090119  |
| B4       | 14  | 80  | M   | Pancreas            | Duct adenocarcinoma                                   | T2N0M0                       | 2      |       | Malignant | Dpa090119  |
| B5       | 15  | 68  | F   | Pancreas            | Duct adenocarcinoma                                   | T3N0M0                       | 2      |       | Malignant | Dpa041572  |
| B6       | 16  | 68  | F   | Pancreas            | Duct adenocarcinoma                                   | T3N0M0                       | 2      |       | Malignant | Dpa041572  |
| B7       | 17  | 62  | F   | Pancreas            | Duct adenocarcinoma                                   | T3N1M0                       | 2      |       | Malignant | Dpa100207  |
| B8       | 18  | 62  | F   | Pancreas            | Duct adenocarcinoma                                   | T3N1M0                       | -      |       | Malignant | Dpa100207  |
| B9       | 19  | 49  | M   | Pancreas            | Duct adenocarcinoma                                   | T3N0M0                       | 2      |       | Malignant | Dpa040571  |
| B10      | 20  | 49  | M   | Pancreas            | Duct adenocarcinoma                                   | T3N0M0                       | 2      |       | Malignant | Dpa040571  |
| C1       | 21  | 56  | F   | Pancreas            | Duct adenocarcinoma (sparse)                          | T2N0M0                       | 1      |       | Malignant | Dpa080285  |
| C2       | 22  | 56  | F   | Pancreas            |                                                       | Duct adenocarcinoma          | T2N0M0 | 1     |           | Malignant  |
| C3       | 23  | 61  | M   | Pancreas            | Duct adenocarcinoma                                   | T3N0M1                       | 2      |       | Malignant | Dpa040165  |
| C4       | 24  | 61  | M   | Pancreas            | Duct adenocarcinoma                                   | T3N0M1                       | 2      |       | Malignant | Dpa040165  |
| C5       | 25  | 52  | M   | Pancreas            | Duct adenocarcinoma                                   | T2N0M0                       | 3      |       | Malignant | Dpa040753  |
| C6       | 26  | 52  | M   | Pancreas            | Duct adenocarcinoma                                   | T2N0M0                       | 3      |       | Malignant | Dpa040753  |

|     |    |    |   |          |                                            |        |     |           |           |
|-----|----|----|---|----------|--------------------------------------------|--------|-----|-----------|-----------|
| C7  | 27 | 46 | F | Pancreas | Duct adenocarcinoma                        | T2N0M0 | 2   | Malignant | Dpa080281 |
| C8  | 28 | 46 | F | Pancreas | Duct adenocarcinoma                        | T2N0M0 | 2   | Malignant | Dpa080281 |
| C9  | 29 | 64 | M | Pancreas | Duct adenocarcinoma                        | T3N0M0 | 2-3 | Malignant | Dpa031824 |
| C10 | 30 | 64 | M | Pancreas | Duct adenocarcinoma                        | T3N0M0 | 2-3 | Malignant | Dpa031824 |
| D1  | 31 | 48 | F | Pancreas | Duct adenocarcinoma                        | T3N0M0 | 2   | Malignant | Dpa030776 |
| D2  | 32 | 48 | F | Pancreas | Duct adenocarcinoma                        | T3N0M0 | 2   | Malignant | Dpa030776 |
| D3  | 33 | 76 | F | Pancreas | Duct adenocarcinoma                        | T4N0M0 | 2   | Malignant | Dpa030468 |
| D4  | 34 | 76 | F | Pancreas | Duct adenocarcinoma with necrosis          | T4N0M0 | 2   | Malignant | Dpa030468 |
| D5  | 35 | 65 | M | Pancreas | Duct adenocarcinoma                        | T3N0M0 | 2   | Malignant | Dpa031922 |
| D6  | 36 | 65 | M | Pancreas | Duct adenocarcinoma                        | T3N0M0 | 2   | Malignant | Dpa031922 |
| D7  | 37 | 64 | M | Pancreas | Duct adenocarcinoma                        | T3N0M0 | 2   | Malignant | Dpa040561 |
| D8  | 38 | 64 | M | Pancreas | Duct adenocarcinoma                        | T3N0M0 | 2   | Malignant | Dpa040561 |
| D9  | 39 | 66 | F | Pancreas | Duct adenocarcinoma                        | T2N0M0 | 3   | Malignant | Dpa090156 |
| D10 | 40 | 66 | F | Pancreas | Duct adenocarcinoma                        | T2N0M0 | 3   | Malignant | Dpa090156 |
| E1  | 41 | 65 | M | Pancreas | Duct adenocarcinoma with necrosis          | T3N1M0 | 2   | Malignant | Dpa080082 |
| E2  | 42 | 65 | M | Pancreas | Duct adenocarcinoma                        | T3N1M0 | 2   | Malignant | Dpa080082 |
| E3  | 43 | 68 | F | Pancreas | Duct adenocarcinoma                        | T2N0M0 | 2   | Malignant | Dpa100492 |
| E4  | 44 | 68 | F | Pancreas | Duct adenocarcinoma                        | T2N0M0 | 2   | Malignant | Dpa100492 |
| E5  | 45 | 60 | M | Pancreas | Duct adenocarcinoma                        | T3N0M0 | 1   | Malignant | Dpa031213 |
| E6  | 46 | 60 | M | Pancreas | Duct adenocarcinoma                        | T3N0M0 | 1   | Malignant | Dpa031213 |
| E7  | 47 | 60 | M | Pancreas | Duct adenocarcinoma                        | T3N0M0 | 3   | Malignant | Dpa031219 |
| E8  | 48 | 60 | M | Pancreas | Duct adenocarcinoma                        | T3N0M0 | 3   | Malignant | Dpa031219 |
| E9  | 49 | 60 | M | Pancreas | Duct adenocarcinoma (sparse)               | T2N0M0 | -   | Malignant | Dpa090148 |
| E10 | 50 | 60 | M | Pancreas | Duct adenocarcinoma                        | T2N0M0 | 2-3 | Malignant | Dpa090148 |
| F1  | 51 | 58 | F | Pancreas | Duct adenocarcinoma                        | T3N1M0 | 1   | Malignant | Dpa090144 |
| F2  | 52 | 58 | F | Pancreas | Duct adenocarcinoma                        | T3N1M0 | 1   | Malignant | Dpa090144 |
| F3  | 53 | 71 | F | Pancreas | Duct adenocarcinoma                        | T2N0M0 | -   | Malignant | Dpa090006 |
| F4  | 54 | 71 | F | Pancreas | Duct adenocarcinoma                        | T2N0M0 | 2   | Malignant | Dpa090006 |
| F5  | 55 | 51 | M | Pancreas | Duct adenocarcinoma                        | T3N1M1 | 2-3 | Malignant | Dpa080277 |
| F6  | 56 | 51 | M | Pancreas | Duct adenocarcinoma (sparse)               | T3N1M1 | 2   | Malignant | Dpa080277 |
| F7  | 57 | 47 | F | Pancreas | Duct adenocarcinoma                        | T3N1M0 | 2-3 | Malignant | Dpa031524 |
| F8  | 58 | 47 | F | Pancreas | Duct adenocarcinoma                        | T3N1M0 | 2-3 | Malignant | Dpa031524 |
| F9  | 59 | 51 | F | Pancreas | Duct adenocarcinoma                        | T3N0M0 | 2   | Malignant | Dpa041842 |
| F10 | 60 | 51 | F | Pancreas | Duct adenocarcinoma                        | T3N0M0 | 2   | Malignant | Dpa041842 |
| G1  | 61 | 54 | M | Pancreas | Duct adenocarcinoma                        | T2N0M0 | 2   | Malignant | Dpa090151 |
| G2  | 62 | 54 | M | Pancreas | Duct adenocarcinoma                        | T2N0M0 | 2   | Malignant | Dpa090151 |
| G3  | 63 | 56 | M | Pancreas | Duct adenocarcinoma                        | T2N0M0 | 3   | Malignant | Dpa041019 |
| G4  | 64 | 56 | M | Pancreas | Duct adenocarcinoma                        | T2N0M0 | 3   | Malignant | Dpa041019 |
| G5  | 65 | 62 | M | Pancreas | Duct adenocarcinoma                        | T3N0M0 | -   | Malignant | Dpa040685 |
| G6  | 66 | 62 | M | Pancreas | Duct adenocarcinoma                        | T3N0M0 | 3   | Malignant | Dpa040685 |
| G7  | 67 | 53 | F | Pancreas | Duct adenocarcinoma with necrosis (sparse) | T2N0M0 | 3   | Malignant | Dpa041349 |



|     |     |    |   |          |                                                       |        |   |           |           |
|-----|-----|----|---|----------|-------------------------------------------------------|--------|---|-----------|-----------|
| G8  | 68  | 53 | F | Pancreas | Duct adenocarcinoma with necrosis (sparse)            | T2N0M0 | 3 | Malignant | Dpa041349 |
| G9  | 69  | 78 | M | Pancreas | Duct adenocarcinoma                                   | T2N0M0 | 3 | Malignant | Dpa040361 |
| G10 | 70  | 78 | M | Pancreas | Duct adenocarcinoma                                   | T2N0M0 | 3 | Malignant | Dpa040361 |
| H1  | 71  | 48 | F | Pancreas | Duct adenocarcinoma                                   | T3N0M0 | 3 | Malignant | Dpa051007 |
| H2  | 72  | 48 | F | Pancreas | Duct adenocarcinoma                                   | T3N0M0 | 3 | Malignant | Dpa051007 |
| H3  | 73  | 66 | F | Pancreas | Duct adenocarcinoma                                   | T2N1M0 | 3 | Malignant | Dpa090174 |
| H4  | 74  | 66 | F | Pancreas | Duct adenocarcinoma                                   | T2N1M0 | 3 | Malignant | Dpa090174 |
| H5  | 75  | 55 | F | Pancreas | Duct adenocarcinoma                                   | T2N0M0 | 3 | Malignant | Dpa090171 |
| H6  | 76  | 55 | F | Pancreas | Duct adenocarcinoma                                   | T2N0M0 | 3 | Malignant | Dpa090171 |
| I1  | 81  | 48 | F | Pancreas | Adjacent normal pancreas tissue                       | -      | - | NAT       | Dpa050452 |
| I2  | 82  | 48 | F | Pancreas | Adjacent normal pancreas tissue                       | -      | - | NAT       | Dpa050452 |
| I3  | 83  | 31 | M | Pancreas | Adjacent normal pancreas tissue                       | -      | - | NAT       | Dpa050632 |
| I4  | 84  | 31 | M | Pancreas | Adjacent normal pancreas tissue                       | -      | - | NAT       | Dpa050632 |
| I5  | 85  | 51 | F | Pancreas | Adjacent normal pancreas tissue                       | -      | - | NAT       | Dpa051559 |
| I6  | 86  | 51 | F | Pancreas | Adjacent normal pancreas tissue                       | -      | - | NAT       | Dpa051559 |
| I7  | 87  | 51 | M | Pancreas | Adjacent normal pancreas tissue                       | -      | - | NAT       | Dpa050664 |
| I8  | 88  | 51 | M | Pancreas | Adjacent normal pancreas tissue                       | -      | - | NAT       | Dpa050664 |
| I9  | 89  | 52 | M | Pancreas | Adjacent normal pancreas tissue (duct adenocarcinoma) | -      | 2 | NAT       | Dpa050998 |
| I10 | 90  | 52 | M | Pancreas | Adjacent normal pancreas tissue                       | -      | - | NAT       | Dpa050998 |
| J1  | 91  | 47 | M | Pancreas | Pancreas tissue                                       | -      | - | Normal    | Dpa06N004 |
| J2  | 92  | 47 | M | Pancreas | Pancreas tissue                                       | -      | - | Normal    | Dpa06N004 |
| J3  | 93  | 50 | M | Pancreas | Pancreas tissue                                       | -      | - | Normal    | Dpa06N011 |
| J4  | 94  | 50 | M | Pancreas | Pancreas tissue                                       | -      | - | Normal    | Dpa06N011 |
| J5  | 95  | 21 | F | Pancreas | Pancreas tissue                                       | -      | - | Normal    | Dpa05N001 |
| J6  | 96  | 21 | F | Pancreas | Pancreas tissue                                       | -      | - | Normal    | Dpa05N001 |
| J7  | 97  | 27 | M | Pancreas | Pancreas tissue                                       | -      | - | Normal    | Dpa08N047 |
| J8  | 98  | 27 | M | Pancreas | Pancreas tissue                                       | -      | - | Normal    | Dpa08N047 |
| J9  | 99  | 40 | M | Pancreas | Pancreas tissue                                       | -      | - | Normal    | Dpa05N005 |
| J10 | 100 | 40 | M | Pancreas | Pancreas tissue                                       | -      | - | Normal    | Dpa05N005 |

**Table S3.** Characteristics of the cohort used for assessing the expression of APLP2.

| Position | No. | Age | Sex | Organ/Anatomic Site | Pathology Diagnosis   | TNM    | Grade  | Stage | Type      |
|----------|-----|-----|-----|---------------------|-----------------------|--------|--------|-------|-----------|
| A1       | 1   | 63  | F   | Pancreas            | Ductal adenocarcinoma | T1N0M0 | II     | 1A    | Malignant |
| A2       | 2   | 63  | F   | Perilesional tissue | NAT                   |        |        |       | NAT       |
| A3       | 3   | 51  | M   | Pancreas            | Ductal adenocarcinoma | T1N0M0 | II     | 1A    | Malignant |
| A4       | 4   | 51  | M   | Perilesional tissue | NAT                   |        |        |       | NAT       |
| A5       | 5   | 65  | M   | Pancreas            | Ductal adenocarcinoma | T1N0M0 | II     | 1A    | Malignant |
| A6       | 6   | 65  | M   | Perilesional tissue | NAT                   |        |        |       | NAT       |
| A7       | 7   | 84  | M   | Pancreas            | Ductal adenocarcinoma | T1N0M0 | I-III  | 1A    | Malignant |
| A8       | 8   | 84  | M   | Perilesional tissue | NAT                   |        |        |       | NAT       |
| A9       | 9   | 70  | M   | Pancreas            | Ductal adenocarcinoma | T1N0M0 | II     | 1A    | Malignant |
| A10      | 10  | 70  | M   | Perilesional tissue | NAT                   |        |        |       | NAT       |
| A11      | 11  | 49  | M   | Pancreas            | Ductal adenocarcinoma | T2N0M0 | II-III | 1B    | Malignant |
| A12      | 12  | 49  | M   | Perilesional tissue | NAT                   |        |        |       | NAT       |
| A13      | 13  | 52  | M   | Pancreas            | Ductal adenocarcinoma | T2N0M0 | II     | 1B    | Malignant |
| A14      | 14  | 52  | M   | Perilesional tissue | NAT                   |        |        |       | NAT       |
| A15      | 15  | 70  | F   | Pancreas            | Ductal adenocarcinoma | T2N0M0 | II     | 1B    | Malignant |
| A16      | 16  | 70  | F   | Perilesional tissue | NAT                   |        |        |       | NAT       |
| B1       | 17  | 54  | M   | Pancreas            | Ductal adenocarcinoma | T2N0M0 | II     | 1B    | Malignant |
| B2       | 18  | 54  | M   | Perilesional tissue | NAT                   |        |        |       | NAT       |
| B3       | 19  | 63  | M   | Pancreas            | Ductal adenocarcinoma | T2N0M0 | II     | 1B    | Malignant |
| B4       | 20  | 63  | M   | Perilesional tissue | NAT                   |        |        |       | NAT       |
| B5       | 21  | 65  | M   | Pancreas            | Ductal adenocarcinoma | T2N0M0 | II     | 1B    | Malignant |
| B6       | 22  | 65  | M   | Perilesional tissue | NAT                   |        |        |       | NAT       |
| B11      | 27  | 71  | M   | Pancreas            | Ductal adenocarcinoma | T2N0M0 | II     | 1B    | Malignant |
| B12      | 28  | 71  | M   | Perilesional tissue | NAT                   |        |        |       | NAT       |
| B13      | 29  | 56  | F   | Pancreas            | Ductal adenocarcinoma | T2N0M0 | II     | 1B    | Malignant |
| B14      | 30  | 56  | F   | Perilesional tissue | NAT                   |        |        |       | NAT       |
| B15      | 31  | 52  | M   | Pancreas            | Ductal adenocarcinoma | T2N0M0 | II     | 1B    | Malignant |
| B16      | 32  | 52  | M   | Perilesional tissue | NAT                   |        |        |       | NAT       |
| C1       | 33  | 57  | M   | Pancreas            | Ductal adenocarcinoma | T2N0M0 | II     | 1B    | Malignant |
| C2       | 34  | 57  | M   | Perilesional tissue | NAT                   |        |        |       | NAT       |
| C3       | 35  | 51  | M   | Pancreas            | Ductal adenocarcinoma | T2N0M0 | II     | 1B    | Malignant |
| C4       | 36  | 51  | M   | Perilesional tissue | NAT                   |        |        |       | NAT       |
| C5       | 37  | 62  | F   | Pancreas            | Ductal adenocarcinoma | T2N0M0 | II     | 1B    | Malignant |
| C6       | 38  | 62  | F   | Perilesional tissue | NAT                   |        |        |       | NAT       |
| C7       | 39  | 55  | F   | Pancreas            | Ductal adenocarcinoma | T2N0M0 | II     | 1B    | Malignant |
| C8       | 40  | 55  | F   | Perilesional tissue | NAT                   |        |        |       | NAT       |
| C9       | 41  | 46  | F   | Pancreas            | Ductal adenocarcinoma | T2N0M0 | II     | 1B    | Malignant |
| C10      | 42  | 46  | F   | Perilesional tissue | NAT                   |        |        |       | NAT       |

|     |    |    |   |                     |                       |        |        |          |           |
|-----|----|----|---|---------------------|-----------------------|--------|--------|----------|-----------|
| C11 | 43 | 69 | M | Pancreas            | Ductal adenocarcinoma | T2N0M0 | II-III | 1B       | Malignant |
| C12 | 44 | 69 | M | Perilesional tissue | NAT                   |        |        |          | NAT       |
| C13 | 45 | 44 | M | Pancreas            | Ductal adenocarcinoma | T2N0M0 | I-II   | 1B       | Malignant |
| C14 | 46 | 44 | M | Perilesional tissue | NAT                   |        |        |          | NAT       |
| C15 | 47 | 64 | M | Pancreas            | Ductal adenocarcinoma | T2N0M0 | II     | 1B       | Malignant |
| C16 | 48 | 64 | M | Perilesional tissue | NAT                   |        |        |          | NAT       |
| D1  | 49 | 46 | M | Pancreas            | Ductal adenocarcinoma | T2N0M0 | I-II   | 1B       | Malignant |
| D2  | 50 | 46 | M | Perilesional tissue | NAT                   |        |        |          | NAT       |
| D3  | 51 | 52 | F | Pancreas            | Ductal adenocarcinoma | T2N0M0 | II     | 1B       | Malignant |
| D4  | 52 | 52 | F | Perilesional tissue | NAT                   |        |        |          | NAT       |
| D5  | 53 | 72 | M | Pancreas            | Ductal adenocarcinoma | T2N0M0 | II-III | 1B       | Malignant |
| D6  | 54 | 72 | M | Perilesional tissue | NAT                   |        |        |          | NAT       |
| D7  | 55 | 71 | M | Pancreas            | Ductal adenocarcinoma | T2N0M0 | II     | 1B       | Malignant |
| D8  | 56 | 71 | M | Perilesional tissue | NAT                   |        |        |          | NAT       |
| D9  | 57 | 64 | F | Pancreas            | Ductal adenocarcinoma | T2N0M0 | I-II   | 1B       | Malignant |
| D10 | 58 | 64 | F | Perilesional tissue | NAT                   |        |        |          | NAT       |
| D13 | 61 | 77 | F | Pancreas            | Ductal adenocarcinoma | T2N0M0 | II-III | 1B       | Malignant |
| D14 | 62 | 77 | F | Perilesional tissue | NAT                   |        |        |          | NAT       |
| D15 | 63 | 61 | M | Pancreas            | Ductal adenocarcinoma | T2N0M0 | II-III | 1B       | Malignant |
| D16 | 64 | 61 | M | Perilesional tissue | NAT                   |        |        |          | NAT       |
| E1  | 65 | 62 | F | Pancreas            | Ductal adenocarcinoma | T2N0M0 | II     | 1B       | Malignant |
| E2  | 66 | 62 | F | Perilesional tissue | NAT                   |        |        |          | NAT       |
| E5  | 69 | 48 | M | Pancreas            | Ductal adenocarcinoma | T2N0M0 | II     | 1B       | Malignant |
| E6  | 70 | 48 | M | Perilesional tissue | NAT                   |        |        |          | NAT       |
| E7  | 71 | 64 | M | Pancreas            | Ductal adenocarcinoma | T2N0M0 | II     | 1B       | Malignant |
| E8  | 72 | 64 | M | Perilesional tissue | NAT                   |        |        |          | NAT       |
| E9  | 73 | 52 | M | Pancreas            | Ductal adenocarcinoma | T2N0M0 | II-III | 1B       | Malignant |
| E10 | 74 | 52 | M | Perilesional tissue | NAT                   |        |        |          | NAT       |
| E15 | 79 | 63 | F | Pancreas            | Ductal adenocarcinoma | T2N0M0 | II     | 1B       | Malignant |
| E16 | 80 | 63 | F | Perilesional tissue | NAT                   |        |        |          | NAT       |
| F1  | 81 | 55 | F | Pancreas            | Ductal adenocarcinoma | T2M0   | II     | 1/2/2016 | Malignant |
| F2  | 82 | 55 | F | Perilesional tissue | NAT                   |        |        |          | NAT       |
| F3  | 83 | 62 | F | Pancreas            | Ductal adenocarcinoma | T2M0   | II-III | 1-2      | Malignant |
| F4  | 84 | 62 | F | Perilesional tissue | NAT                   |        |        |          | NAT       |
| F5  | 85 | 78 | F | Pancreas            | Ductal adenocarcinoma | T3N0M0 | II     | 2A       | Malignant |
| F6  | 86 | 78 | F | Perilesional tissue | NAT                   |        |        |          | NAT       |
| F7  | 87 | 63 | M | Pancreas            | Ductal adenocarcinoma | T3N0M0 | II     | 2A       | Malignant |
| F8  | 88 | 63 | M | Perilesional tissue | NAT                   |        |        |          | NAT       |
| F11 | 91 | 55 | M | Pancreas            | Ductal adenocarcinoma | T3N0M0 | II     | 2A       | Malignant |
| F12 | 92 | 55 | M | Perilesional tissue | NAT                   |        |        |          | NAT       |
| F13 | 93 | 60 | M | Pancreas            | Ductal adenocarcinoma | T3N0M0 | II-III | 2A       | Malignant |

|     |     |    |   |                     |                       |        |        |     |  |           |
|-----|-----|----|---|---------------------|-----------------------|--------|--------|-----|--|-----------|
| F14 | 94  | 60 | M | Perilesional tissue | NAT                   |        |        |     |  | NAT       |
| F15 | 95  | 64 | M | Pancreas            | Ductal adenocarcinoma | T1N1M0 | II     | 2B  |  | Malignant |
| F16 | 96  | 64 | M | Perilesional tissue | NAT                   |        |        |     |  | NAT       |
| G1  | 97  | 52 | F | Pancreas            | Ductal adenocarcinoma | T1N1M0 | II     | 2B  |  | Malignant |
| G2  | 98  | 52 | F | Perilesional tissue | NAT                   |        |        |     |  | NAT       |
| G3  | 99  | 69 | M | Pancreas            | Ductal adenocarcinoma | T2N1M0 | II     | 2B  |  | Malignant |
| G4  | 100 | 69 | M | Perilesional tissue | NAT                   |        |        |     |  | NAT       |
| G5  | 101 | 61 | M | Pancreas            | Ductal adenocarcinoma | T2N1M0 | III    | 2B  |  | Malignant |
| G6  | 102 | 61 | M | Perilesional tissue | NAT                   |        |        |     |  | NAT       |
| G7  | 103 | 52 | M | Pancreas            | Ductal adenocarcinoma | T2N1M0 | II     | 2B  |  | Malignant |
| G8  | 104 | 52 | M | Perilesional tissue | NAT                   |        |        |     |  | NAT       |
| G9  | 105 | 57 | F | Pancreas            | Ductal adenocarcinoma | T2N1M0 | II     | 2B  |  | Malignant |
| G10 | 106 | 57 | F | Perilesional tissue | NAT                   |        |        |     |  | NAT       |
| G11 | 107 | 60 | F | Pancreas            | Ductal adenocarcinoma | T2N1M0 | II-III | 2B  |  | Malignant |
| G12 | 108 | 60 | F | Perilesional tissue | NAT                   |        |        |     |  | NAT       |
| G13 | 109 | 65 | M | Pancreas            | Ductal adenocarcinoma | T2N1M0 | III    | 2B  |  | Malignant |
| G14 | 110 | 65 | M | Perilesional tissue | NAT                   |        |        |     |  | NAT       |
| G15 | 111 | 65 | M | Pancreas            | Ductal adenocarcinoma | T2N1M0 | II     | 2B  |  | Malignant |
| G16 | 112 | 65 | M | Perilesional tissue | NAT                   |        |        |     |  | NAT       |
| H1  | 113 | 41 | M | Pancreas            | Ductal adenocarcinoma | T2N1M0 | II-III | 2B  |  | Malignant |
| H2  | 114 | 41 | M | Perilesional tissue | NAT                   |        |        |     |  | NAT       |
| H3  | 115 | 64 | M | Pancreas            | Ductal adenocarcinoma | T2N1M0 | II     | 2B  |  | Malignant |
| H4  | 116 | 64 | M | Perilesional tissue | NAT                   |        |        |     |  | NAT       |
| H5  | 117 | 55 | F | Pancreas            | Ductal adenocarcinoma | T2N1M0 | II     | 2B  |  | Malignant |
| H6  | 118 | 55 | F | Perilesional tissue | NAT                   |        |        |     |  | NAT       |
| H7  | 119 | 71 | M | Pancreas            | Ductal adenocarcinoma | T2N1M0 | II     | 2B  |  | Malignant |
| H8  | 120 | 71 | M | Perilesional tissue | NAT                   |        |        |     |  | NAT       |
| H9  | 121 | 62 | M | Pancreas            | Ductal adenocarcinoma | T2N1M0 | I-II   | 2B  |  | Malignant |
| H10 | 122 | 62 | M | Perilesional tissue | NAT                   |        |        |     |  | NAT       |
| H11 | 123 | 73 | M | Pancreas            | Ductal adenocarcinoma | T2N1M0 | II     | 2B  |  | Malignant |
| H12 | 124 | 73 | M | Perilesional tissue | NAT                   |        |        |     |  | NAT       |
| H13 | 125 | 71 | M | Pancreas            | Ductal adenocarcinoma | T2N1M0 | II     | 2B  |  | Malignant |
| H14 | 126 | 71 | M | Perilesional tissue | NAT                   |        |        |     |  | NAT       |
| H15 | 127 | 65 | M | Pancreas            | Ductal adenocarcinoma | T2N1M0 | II     | 2B  |  | Malignant |
| H16 | 128 | 65 | M | Perilesional tissue | NAT                   |        |        |     |  | NAT       |
| I1  | 129 | 44 | F | Pancreas            | Ductal adenocarcinoma | T2-M0  | III    | 1-2 |  | Malignant |
| I2  | 130 | 44 | F | Perilesional tissue | NAT                   |        |        |     |  | NAT       |
| I3  | 131 | 44 | F | Pancreas            | Ductal adenocarcinoma | T2N1M0 | I-II   | 2B  |  | Malignant |
| I4  | 132 | 44 | F | Perilesional tissue | NAT                   |        |        |     |  | NAT       |
| I5  | 133 | 62 | M | Pancreas            | Ductal adenocarcinoma | T2N0M1 | II     | 4   |  | Malignant |
| I6  | 134 | 62 | M | Perilesional tissue | NAT                   |        |        |     |  | NAT       |

|     |     |    |   |                     |                       |        |        |   |           |
|-----|-----|----|---|---------------------|-----------------------|--------|--------|---|-----------|
| I7  | 135 | 60 | F | Pancreas            | Ductal adenocarcinoma | T2–M1  | III    | 4 | Malignant |
| I8  | 136 | 60 | F | Perilesional tissue | NAT                   |        |        |   | NAT       |
| I11 | 139 | 72 | M | Pancreas            | Ductal adenocarcinoma | T2N1M1 | II–III | 4 | Malignant |
| I12 | 140 | 72 | M | Perilesional tissue | NAT                   |        |        |   | NAT       |
| I13 | 141 | 56 | F | Pancreas            | Ductal adenocarcinoma | T3–M1  | II–III | 4 | Malignant |
| I14 | 142 | 56 | F | Perilesional tissue | NAT                   |        |        |   | NAT       |
| I15 | 143 | 60 | F | Pancreas            | Ductal adenocarcinoma | T3N1M1 | II     | 4 | Malignant |
| I16 | 144 | 60 | F | Perilesional tissue | NAT                   |        |        |   | NAT       |

**Table S4.** Significantly enriched pathways of 397 upregulated genes from the meta-analysis of five datasets (GSE16515, GSE28735, GSE15471, GSE18670, and GSE41368).

| Pathway                                 | Total | Expected | Hits | <i>p</i> -Value | FDR      |
|-----------------------------------------|-------|----------|------|-----------------|----------|
| Focal adhesion                          | 200   | 39       | 142  | 3.40E-59        | 7.38E-57 |
| Pathways in cancer                      | 310   | 60.5     | 178  | 1.93E-53        | 2.10E-51 |
| Regulation of actin cytoskeleton        | 182   | 35.5     | 115  | 8.84E-40        | 6.39E-38 |
| Cell cycle                              | 124   | 24.2     | 90   | 1.47E-38        | 7.97E-37 |
| HTLV-I infection                        | 199   | 38.8     | 111  | 2.91E-31        | 1.26E-29 |
| Prostate cancer                         | 87    | 17       | 66   | 2.32E-30        | 8.41E-29 |
| Chronic myeloid leukemia                | 73    | 14.2     | 57   | 1.74E-27        | 5.40E-26 |
| ErbB signaling pathway                  | 87    | 17       | 61   | 5.38E-25        | 1.46E-23 |
| Pancreatic cancer                       | 69    | 13.5     | 52   | 7.21E-24        | 1.74E-22 |
| Small cell lung cancer                  | 80    | 15.6     | 56   | 5.75E-23        | 1.21E-21 |
| Renal cell carcinoma                    | 60    | 11.7     | 47   | 6.15E-23        | 1.21E-21 |
| Bacterial invasion of epithelial cells  | 56    | 10.9     | 45   | 7.57E-23        | 1.37E-21 |
| Endometrial cancer                      | 44    | 8.58     | 38   | 1.19E-21        | 1.98E-20 |
| Adherens junction                       | 70    | 13.7     | 50   | 3.06E-21        | 4.75E-20 |
| Progesterone-mediated oocyte maturation | 80    | 15.6     | 53   | 4.60E-20        | 6.65E-19 |
| Acute myeloid leukemia                  | 57    | 11.1     | 43   | 6.04E-20        | 8.20E-19 |
| Neurotrophin signaling pathway          | 123   | 24       | 69   | 7.92E-20        | 1.01E-18 |
| Colorectal cancer                       | 49    | 9.56     | 39   | 1.16E-19        | 1.40E-18 |
| ECM-receptor interaction                | 84    | 16.4     | 53   | 1.26E-18        | 1.43E-17 |
| Glioma                                  | 65    | 12.7     | 45   | 2.33E-18        | 2.52E-17 |
| Insulin signaling pathway               | 137   | 26.7     | 69   | 1.82E-16        | 1.88E-15 |
| Gap junction                            | 89    | 17.4     | 51   | 1.88E-15        | 1.86E-14 |
| TGF-beta signaling pathway              | 84    | 16.4     | 49   | 2.55E-15        | 2.41E-14 |
| Shigellosis                             | 47    | 9.17     | 34   | 4.48E-15        | 4.05E-14 |
| Oocyte meiosis                          | 108   | 21.1     | 57   | 5.95E-15        | 5.16E-14 |
| Non-small cell lung cancer              | 52    | 10.1     | 36   | 6.42E-15        | 5.29E-14 |
| Epstein-Barr virus infection            | 91    | 17.8     | 51   | 6.59E-15        | 5.29E-14 |
| Hypertrophic cardiomyopathy (HCM)       | 25    | 4.88     | 23   | 7.56E-15        | 5.86E-14 |

|                                                            |     |      |    |          |          |
|------------------------------------------------------------|-----|------|----|----------|----------|
| Tight junction                                             | 118 | 23   | 59 | 4.73E-14 | 3.54E-13 |
| Chagas disease (American trypanosomiasis)                  | 89  | 17.4 | 49 | 5.85E-14 | 4.23E-13 |
| T cell receptor signaling pathway                          | 98  | 19.1 | 52 | 7.26E-14 | 5.08E-13 |
| Wnt signaling pathway                                      | 144 | 28.1 | 67 | 7.67E-14 | 5.20E-13 |
| Melanoma                                                   | 68  | 13.3 | 41 | 1.08E-13 | 7.10E-13 |
| Hepatitis C                                                | 100 | 19.5 | 52 | 2.12E-13 | 1.36E-12 |
| Salmonella infection                                       | 72  | 14   | 42 | 2.67E-13 | 1.65E-12 |
| Fc gamma R-mediated phagocytosis                           | 97  | 18.9 | 50 | 9.74E-13 | 5.87E-12 |
| Measles                                                    | 102 | 19.9 | 51 | 2.65E-12 | 1.51E-11 |
| Toxoplasmosis                                              | 93  | 18.1 | 48 | 2.65E-12 | 1.51E-11 |
| Axon guidance                                              | 118 | 23   | 55 | 1.33E-11 | 7.38E-11 |
| GnRH signaling pathway                                     | 94  | 18.3 | 47 | 1.96E-11 | 1.06E-10 |
| Apoptosis                                                  | 83  | 16.2 | 43 | 3.21E-11 | 1.70E-10 |
| Dilated cardiomyopathy                                     | 78  | 15.2 | 41 | 5.11E-11 | 2.64E-10 |
| Chemokine signaling pathway                                | 189 | 36.9 | 74 | 1.36E-10 | 6.84E-10 |
| Influenza A                                                | 107 | 20.9 | 49 | 3.91E-10 | 1.93E-09 |
| Bladder cancer                                             | 29  | 5.66 | 21 | 8.83E-10 | 4.26E-09 |
| Jak-STAT signaling pathway                                 | 99  | 19.3 | 45 | 2.79E-09 | 1.27E-08 |
| Pathogenic Escherichia coli infection                      | 35  | 6.83 | 23 | 2.79E-09 | 1.27E-08 |
| Cardiac muscle contraction                                 | 12  | 2.34 | 12 | 2.87E-09 | 1.27E-08 |
| p53 signaling pathway                                      | 68  | 13.3 | 35 | 2.87E-09 | 1.27E-08 |
| Thyroid cancer                                             | 28  | 5.46 | 20 | 3.34E-09 | 1.45E-08 |
| Amoebiasis                                                 | 46  | 8.97 | 27 | 4.43E-09 | 1.89E-08 |
| B cell receptor signaling pathway                          | 75  | 14.6 | 37 | 4.62E-09 | 1.89E-08 |
| Fc epsilon RI signaling pathway                            | 75  | 14.6 | 37 | 4.62E-09 | 1.89E-08 |
| Leukocyte transendothelial migration                       | 108 | 21.1 | 47 | 7.09E-09 | 2.85E-08 |
| Long-term potentiation                                     | 70  | 13.7 | 35 | 7.75E-09 | 3.01E-08 |
| MAPK signaling pathway                                     | 265 | 51.7 | 90 | 7.76E-09 | 3.01E-08 |
| Melanogenesis                                              | 101 | 19.7 | 44 | 2.09E-08 | 7.94E-08 |
| RIG-I-like receptor signaling pathway                      | 49  | 9.56 | 27 | 2.89E-08 | 1.08E-07 |
| Epithelial cell signaling in Helicobacter pylori infection | 37  | 7.22 | 22 | 8.98E-08 | 3.30E-07 |
| Osteoclast differentiation                                 | 119 | 23.2 | 48 | 9.13E-08 | 3.30E-07 |
| SNARE interactions in vesicular transport                  | 27  | 5.27 | 18 | 1.13E-07 | 4.02E-07 |
| Arrhythmogenic right ventricular cardiomyopathy (ARVC)     | 12  | 2.34 | 11 | 1.47E-07 | 5.13E-07 |
| Vascular smooth muscle contraction                         | 109 | 21.3 | 44 | 3.09E-07 | 1.06E-06 |
| mTOR signaling pathway                                     | 45  | 8.78 | 24 | 3.92E-07 | 1.33E-06 |
| Herpes simplex infection                                   | 103 | 20.1 | 42 | 4.15E-07 | 1.38E-06 |
| Viral myocarditis                                          | 26  | 5.07 | 16 | 2.87E-06 | 9.44E-06 |
| VEGF signaling pathway                                     | 76  | 14.8 | 32 | 4.45E-06 | 1.44E-05 |
| Natural killer cell mediated cytotoxicity                  | 138 | 26.9 | 49 | 5.77E-06 | 1.84E-05 |
| Toll-like receptor signaling pathway                       | 97  | 18.9 | 37 | 1.30E-05 | 4.08E-05 |

|                                           |     |      |    |          |          |
|-------------------------------------------|-----|------|----|----------|----------|
| Long-term depression                      | 70  | 13.7 | 29 | 1.82E-05 | 5.64E-05 |
| Prion diseases                            | 21  | 4.1  | 13 | 2.34E-05 | 7.14E-05 |
| Leishmaniasis                             | 51  | 9.95 | 23 | 2.63E-05 | 7.94E-05 |
| Type II diabetes mellitus                 | 48  | 9.36 | 22 | 2.89E-05 | 8.59E-05 |
| Alzheimer's disease                       | 49  | 9.56 | 22 | 4.29E-05 | 1.26E-04 |
| Basal cell carcinoma                      | 47  | 9.17 | 21 | 6.99E-05 | 2.02E-04 |
| Calcium signaling pathway                 | 177 | 34.5 | 55 | 1.24E-04 | 3.54E-04 |
| Cholinergic synapse                       | 95  | 18.5 | 34 | 1.30E-04 | 3.67E-04 |
| NOD-like receptor signaling pathway       | 49  | 9.56 | 21 | 1.46E-04 | 4.06E-04 |
| Vibrio cholerae infection                 | 19  | 3.71 | 11 | 2.38E-04 | 6.53E-04 |
| Adipocytokine signaling pathway           | 63  | 12.3 | 24 | 4.39E-04 | 1.19E-03 |
| Hedgehog signaling pathway                | 56  | 10.9 | 22 | 4.57E-04 | 1.23E-03 |
| Dorso-ventral axis formation              | 12  | 2.34 | 8  | 4.77E-04 | 1.26E-03 |
| Carbohydrate digestion and absorption     | 18  | 3.51 | 10 | 7.22E-04 | 1.89E-03 |
| Pertussis                                 | 52  | 10.1 | 20 | 1.13E-03 | 2.91E-03 |
| African trypanosomiasis                   | 25  | 4.88 | 12 | 1.19E-03 | 3.03E-03 |
| Glycolysis / Gluconeogenesis              | 65  | 12.7 | 23 | 1.86E-03 | 4.69E-03 |
| Notch signaling pathway                   | 47  | 9.17 | 18 | 2.08E-03 | 5.19E-03 |
| Salivary secretion                        | 49  | 9.56 | 18 | 3.55E-03 | 8.76E-03 |
| Pancreatic secretion                      | 30  | 5.85 | 12 | 7.57E-03 | 1.85E-02 |
| Retrograde endocannabinoid signaling      | 60  | 11.7 | 20 | 7.73E-03 | 1.86E-02 |
| Endocytosis                               | 101 | 19.7 | 30 | 8.55E-03 | 2.02E-02 |
| Aldosterone-regulated sodium reabsorption | 34  | 6.63 | 13 | 8.58E-03 | 2.02E-02 |
| Malaria                                   | 11  | 2.15 | 6  | 1.02E-02 | 2.38E-02 |
| Tuberculosis                              | 174 | 33.9 | 46 | 1.43E-02 | 3.30E-02 |
| Gastric acid secretion                    | 56  | 10.9 | 18 | 1.66E-02 | 3.80E-02 |
| Circadian rhythm-mammal                   | 22  | 4.29 | 9  | 1.70E-02 | 3.84E-02 |
| Dopaminergic synapse                      | 124 | 24.2 | 34 | 1.91E-02 | 4.27E-02 |
| Rheumatoid arthritis                      | 19  | 3.71 | 8  | 2.00E-02 | 4.42E-02 |

**Table S5.** Summary of the CHAT analysis.

| Hallmarks of Cancer        | Number of Papers * | Candidates Involved in the Hallmarks of Cancer                                                                                     |
|----------------------------|--------------------|------------------------------------------------------------------------------------------------------------------------------------|
| Invasion and metastasis    | 5912               | AGR2, LAMC2, MMP11, TAGLN2, ADAM9, ANXA2, CDH3, MSLN, SERPINB5, CD82, CLDN18, EPHA2, EZR, FXYD3, GPRC5A, ITGA2, MET, MST1R, SLC2A1 |
| Immune destruction         | 257                | AGR2, MMP11, MSLN, CD82, EPHA2, ITGB6                                                                                              |
| Cellular energetics        | 112                | AGR2, GAPDH, ADAM9, ANXA2, EPHA2, MET, NQO1, SLC2A1                                                                                |
| Replicative immortality    | 19                 | AGR2, GAPDH, CD82, EPHA2                                                                                                           |
| Evading growth suppressors | 415                | AGR2, GAPDH, LAMC2, TAGLN2, ADAM9, ANXA2, APLP2, CDH3, MSLN, EPHA2, GPRC5A, ITGA2, NQO1                                            |

|                                    |      |                                                                                                                                                  |
|------------------------------------|------|--------------------------------------------------------------------------------------------------------------------------------------------------|
| Genome instability and mutation    | 1144 | AGR2, GAPDH, LAMC2, TAGLN2, ADAM9, ANXA2, APLP2, CDH3, CLDN18, EPHA2, EZR, FXYD3, GPRC5A, ITGA2, ITGB6, MET, MST1R, NQO1, SLC2A1                 |
| Inducing angiogenesis              | 444  | AGR2, GAPDH, LAMC2, MMP11, TAGLN2, ADAM9, ANXA2, MSLN, CD82, CLDN18, EPHA2, FXYD3, ITGA2, MET, NQO1, SLC2A1                                      |
| Resisting cell death               | 1623 | GAPDH, LAMC2, MMP11, TAGLN2, ADAM9, ANXA2, APLP2, CDH3, MSLN, SERPINB5, CD82, EPHA2, FXYD3, GPRC5A, ITGB6, NQO1, SLC2A1                          |
| Sustaining proliferative signaling | 858  | AGR2, GAPDH, LAMC2, MMP11, TAGLN2, ADAM9, ANXA2, APLP2, CDH3, MSLN, SERPINB5, CD82, CLDN18, EPHA2, FXYD3, GPRC5A, ITGA2, ITGB6, MET, MST1R, NQO1 |
| Tumor promoting inflammation       | 443  | AGR2, GAPDH, LAMC2, TAGLN2, ADAM9, ANXA2, MSLN, SERPINB5, EPHA2, GPRC5A, ITGA2, ITGB6, MST1R, NQO1                                               |

\* The approximate estimation of the number of papers reported in each hallmark in pancreatic cancer. Search query: "Pancreatic cancer" OR "Pancreatic adenocarcinoma" OR "PDAC". Search date: April 2018



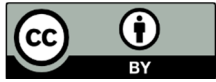

© 2019 by the authors. Licensee MDPI, Basel, Switzerland. This article is an open access article distributed under the terms and conditions of the Creative Commons Attribution (CC BY) license (<http://creativecommons.org/licenses/by/4.0/>).
